# Supplementary material
Source: PubMed Central journal article supplement (PMC1748175)

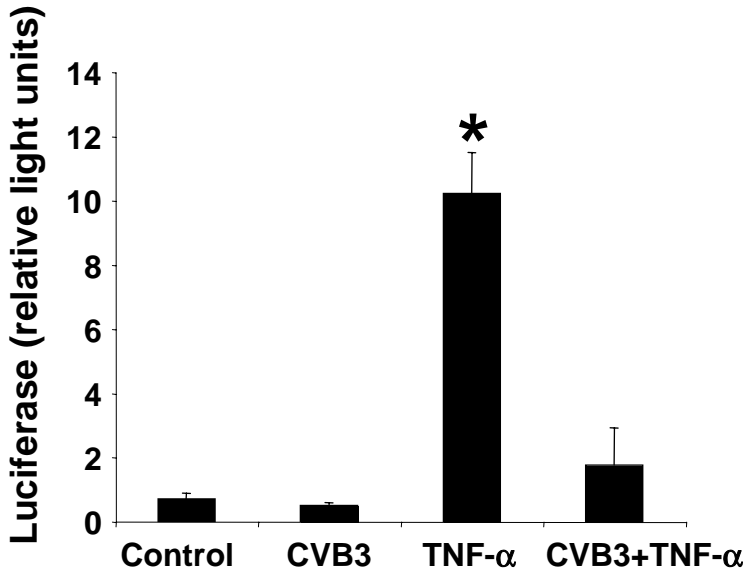

Supplement: pnas_0606019103_1.pdf [file pnas_0606019103_1.pdf]

**3C<sup>pro</sup> mutant ( $\mu\text{g}$ )**

**0**

**1**

**10**

**20**

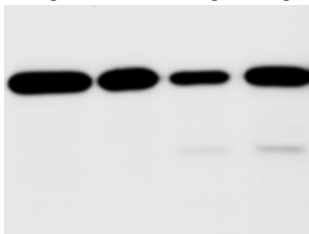

**I $\kappa$ B $\alpha$ -GST**

Fig. S4

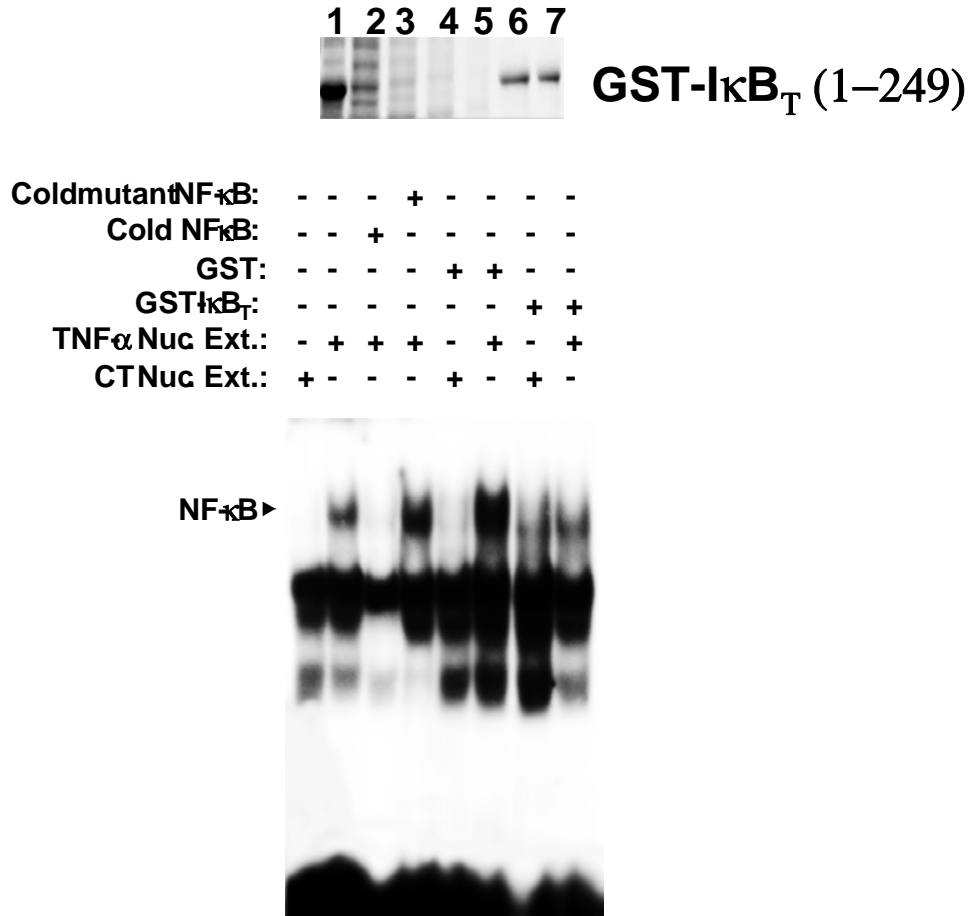

Fig. S5

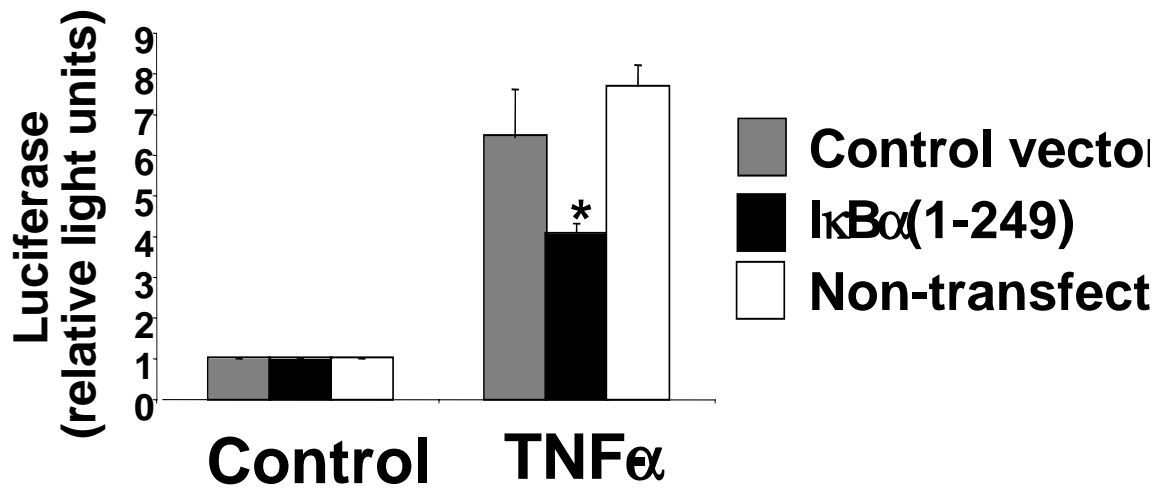

Supplement: pnas_0606019103_2.pdf [file pnas_0606019103_2.pdf]

**3C<sup>pro</sup>  
mutant**

**3C<sup>pro</sup>**

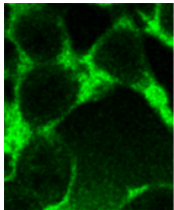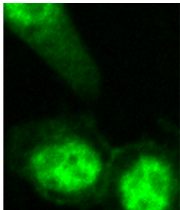

---

**p65**

Fig. S4



Fig. S5



Supplement: pnas_0606019103_3.pdf [file pnas_0606019103_3.pdf]
